# Supplementary material for: Modulation of Bleomycin-Induced Lung Fibrosis by Pegylated Hyaluronidase and Dopamine Receptor Antagonist in Mice
Source: PubMed Central journal article supplement (PMC4415936; doi:10.1371/journal.pone.0125065), 2015-04-30
Supplement: pone.0125065.s002.pdf [file pone.0125065.s002.pdf]

**Table S1:** The survival rate for C57BL/6 mice after bleomycin instillation (21st day of experiment)

| <b>Groups<br/>(n – number of mice in group)</b>         | <b>Percent<br/>of surviving mice</b> |
|---------------------------------------------------------|--------------------------------------|
| Mice received intratracheal 0.9% NaCl (n=10)            | 100                                  |
| <b>REVERSIBLE PNEUMOFIBROSIS</b>                        |                                      |
| Mice with fibrosis 0.9% NaCl treated (n=10)             | 80                                   |
| Mice with fibrosis HYAL treated (n=10)                  | 80                                   |
| Mice with fibrosis pegHYAL treated (n=10)               | 90                                   |
| Mice with fibrosis Spiperone treated (n=10)             | 90                                   |
| Mice with fibrosis pegHYAL and Spiperone treated (n=10) | 100                                  |
| <b>IRREVERSIBLE PNEUMOFIBROSIS</b>                      |                                      |
| Mice with fibrosis 0.9% NaCl treated (n=10)             | 30                                   |
| Mice with fibrosis HYAL treated (n=10)                  | 60                                   |
| Mice with fibrosis pegHYAL treated (n=10)               | 80                                   |
| Mice with fibrosis Spiperone treated (n=10)             | 80                                   |
| Mice with fibrosis pegHYAL and Spiperone treated (n=10) | 90                                   |
