# Supplementary material for: Modulation of Bleomycin-Induced Lung Fibrosis by Pegylated Hyaluronidase and Dopamine Receptor Antagonist in Mice
Source: PubMed Central journal article supplement (PMC4415936; doi:10.1371/journal.pone.0125065), 2015-04-30
Supplement: pone.0125065.s003.pdf [file pone.0125065.s003.pdf]

**Table S2: Number of hematopoietic stem cells and hematopoietic progenitor cells in the bone marrow of C57BL/6 mice on the 1<sup>st</sup> day after bleomycin treatment**

| <b>Lin<sup>-</sup>Sca-1<sup>+</sup>c-kit<sup>+</sup>CD34<sup>-</sup> -cells</b> | <b>Lin<sup>-</sup>Sca-1<sup>+</sup>c-kit<sup>+</sup>CD34<sup>+</sup> -cells</b> | <b>Lin<sup>-</sup>Sca-1<sup>+</sup>c-kit<sup>+</sup> -cells</b> |
|---------------------------------------------------------------------------------|---------------------------------------------------------------------------------|-----------------------------------------------------------------|
| <i>Mice received intratracheal 0.9% NaCl (n=8)</i>                              |                                                                                 |                                                                 |
| 0.013 ± 0.001                                                                   | 0.792 ± 0.082                                                                   | 0.809 ± 0.074                                                   |
| <i>Mice with fibrosis 0.9% NaCl treated (n=8)</i>                               |                                                                                 |                                                                 |
| 0.026 ± 0.002*                                                                  | 0.879 ± 0.074                                                                   | 0.918 ± 0.091                                                   |
