# Supplementary material for: Modulation of Bleomycin-Induced Lung Fibrosis by Pegylated Hyaluronidase and Dopamine Receptor Antagonist in Mice
Source: PubMed Central journal article supplement (PMC4415936; doi:10.1371/journal.pone.0125065), 2015-04-30
Supplement: pone.0125065.s005.pdf [file pone.0125065.s005.pdf]

**S4 Table. Effects of hyaluronidase treatment on hyaluronic acid levels**

| <b>Groups</b><br>(n – number of mice in group)     | <b>Hyaluronic acid</b><br>(ng/right lung lobe) |
|----------------------------------------------------|------------------------------------------------|
| <b>Mice received intratracheal 0.9% NaCl (n=5)</b> | 66.25 ± 5.41                                   |
| <b>Mice with fibrosis 0.9% NaCl treated (n=5)</b>  | 107.65 ± 8.52 *                                |
| <b>Mice with fibrosis HYAL treated (n=5)</b>       | 72.13 ± 5.23 &                                 |
| <b>Mice with fibrosis pegHYAL treated (n=5)</b>    | 68.08 ± 4.78 &                                 |
