# Supplementary material for: Modulation of Bleomycin-Induced Lung Fibrosis by Pegylated Hyaluronidase and Dopamine Receptor Antagonist in Mice
Source: PubMed Central journal article supplement (PMC4415936; doi:10.1371/journal.pone.0125065), 2015-04-30
Supplement: pone.0125065.s006.pdf [file pone.0125065.s006.pdf]

**Table S5: Effects of pegylated hyaluronidase treatment on number of epithelial cells with phenotype (CD45<sup>-</sup>CD31<sup>-</sup>CD326<sup>+</sup>CD34<sup>+</sup>Sca-1<sup>low</sup>) derived from lung of C57BL/6 mice on the 21<sup>st</sup> day after bleomycin instillation**

| <b>Groups</b>                                | <b>Epithelial cells</b> |
|----------------------------------------------|-------------------------|
| <b>Mice received intratracheal 0.9% NaCl</b> | 0.67 ± 0.05             |
| <b>Mice with fibrosis 0.9% NaCl treated</b>  | 0.24 ± 0.02 *           |
| <b>Mice with fibrosis pegHYAL treated</b>    | 0.48 ± 0.03 * &         |
